# Supplementary material
Source: MDPI journal article supplement (https://www.mdpi.com/2673-9992/8/1/4)

**IECBS  
2021**

# The 2nd International Electronic Conference on Brain Sciences

15–30 JULY 2021 | ONLINE

WEBINARS  
AVAILABLE

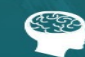

brain sciences

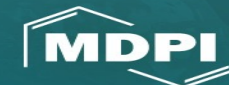

## ***Pomegranate juice ameliorates dopamine release and motor and olfactory deficits in the rotenone-induced rat model of Parkinson's disease***

Małgorzata Kujawska <sup>1\*</sup>, Łukasz Witucki <sup>2</sup>, Marta Karaźniewicz-Łada <sup>3</sup>, Michał Szulc <sup>4</sup>,  
Agata Górka <sup>1</sup> and Jadwiga Jodynis-Liebert <sup>1</sup>

<sup>1</sup> Department of Toxicology, Poznan University of Medical Sciences, Dojazd 30, 60-631 Poznań, Poland

<sup>2</sup> Department of Natural Products Biochemistry, Institute of Bioorganic Chemistry, Polish Academy of Sciences, Noskowskiego 12/14, 61-704, Poznan, Poland

<sup>3</sup> Department of Physical Pharmacy and Pharmacokinetics, Poznan University of Medical Sciences, Świącickiego 6, 60-781 Poznań, Poland

<sup>4</sup> Department of Pharmacology, Poznan University of Medical Sciences, Rokietnicka 5a, 60-806 Poznan, Poland

\*

Correspondence: kujawska@ump.edu.pl

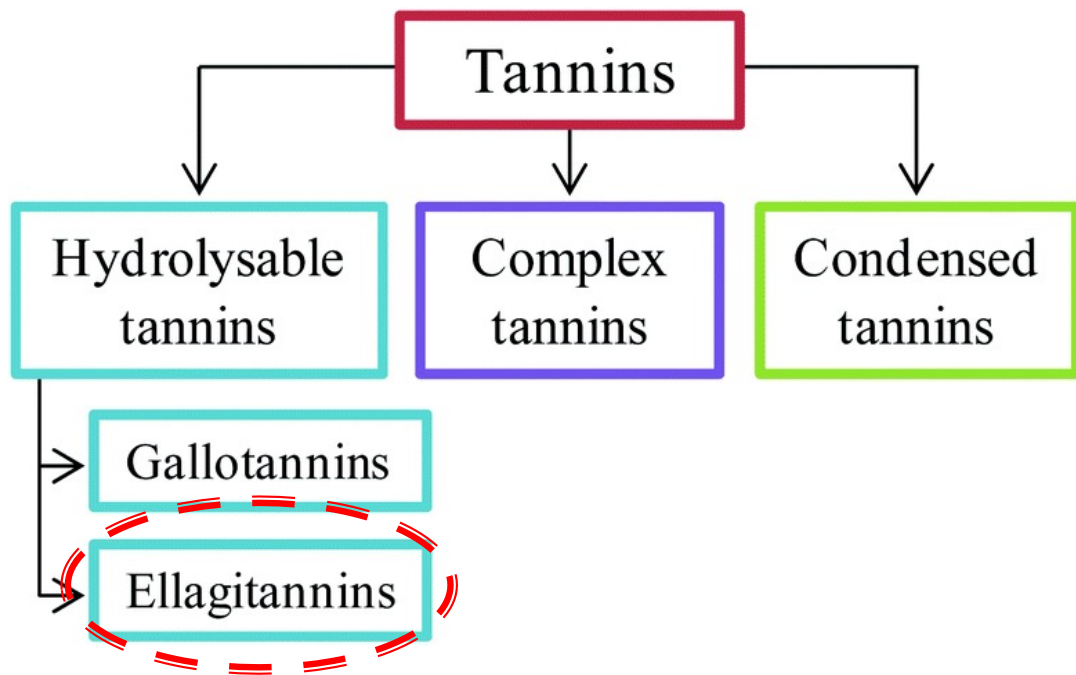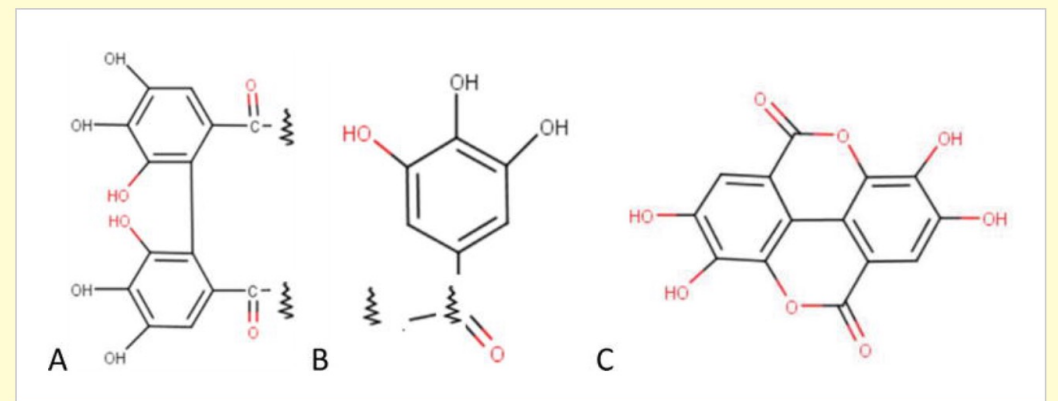

**Figure 1.**

Basic structures of ellagitannins: (A) HHDP acid (R radical); (B) galloyl unit (G radical); (C) ellagic acid.

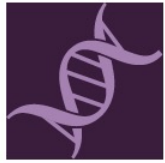

International Journal of  
*Molecular Sciences*

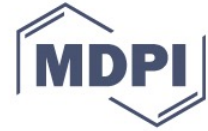

*Article*

# Neuroprotective Effects of Pomegranate Juice against Parkinson's Disease and Presence of Ellagitannins-Derived Metabolite—Urolithin A—In the Brain

Małgorzata Kujawska <sup>1,\*</sup> , Michael Jourdes <sup>2,3</sup> , Monika Kurpik <sup>1</sup>, Michał Szulc <sup>4</sup> ,  
Hanna Szafer <sup>5</sup>, Piotr Chmielarz <sup>6</sup>, Grzegorz Kreiner <sup>6</sup>, Violetta Krajka-Kuźniak <sup>5</sup> ,  
Przemysław Łukasz Mikołajczak <sup>4</sup> , Pierre-Louis Teissedre <sup>2,3</sup>  and Jadwiga Jodynis-Liebert <sup>1</sup>

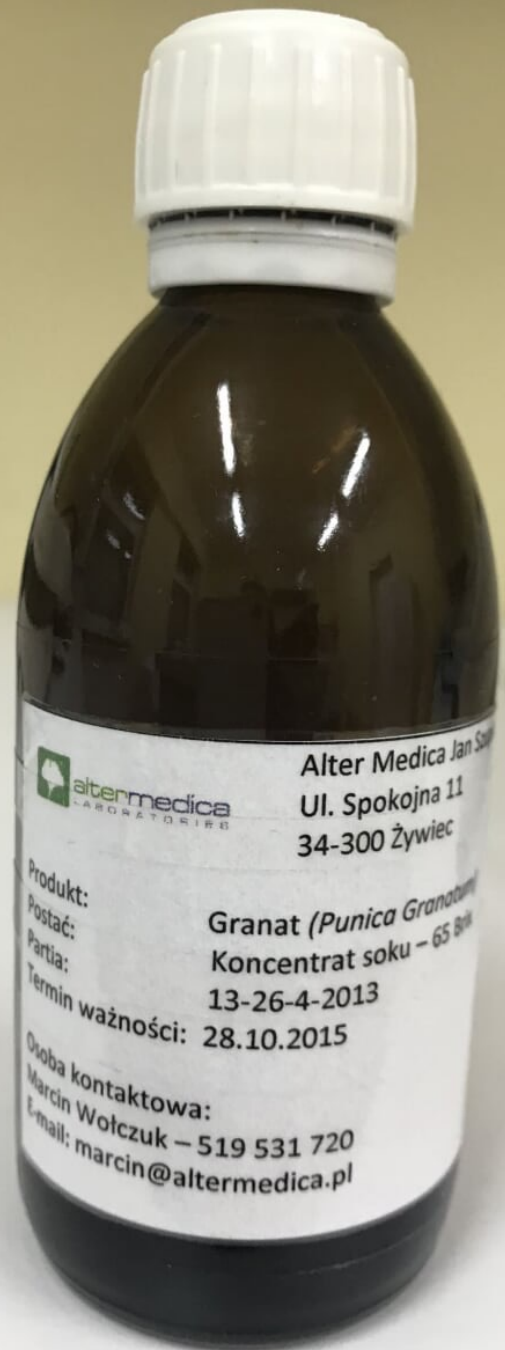

- galloyl-hexoside
- ellagic acid-hexoside
- 3-bis-HHDP-hexoside  
(pedunculagin)
- 4-galloyl-bis-HHDP-hexoside  
(casuarinin)
- ellagic acid



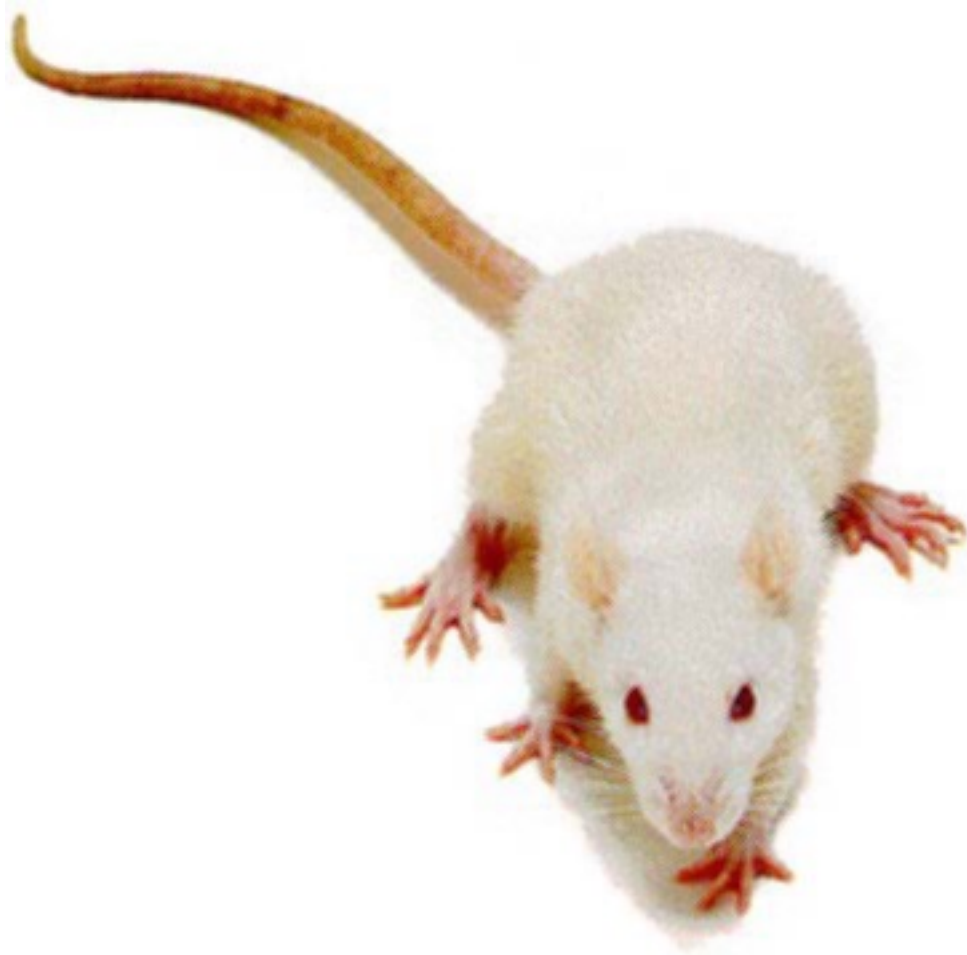

Pomegranate juice\* (*i.g.*)

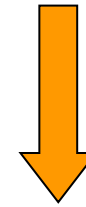

10days

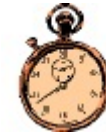

Pomegranate juice\* (*i.g.*)  
Rotenone # (*s.c.*)

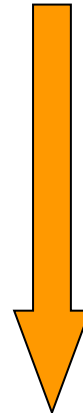

35 days

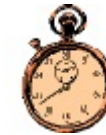

behavioural tests

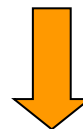

24 hours

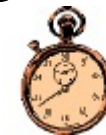

euthanasia /brain harvest

\* 500 [mg/kg b.w.]

# 1.3 [mg/kg b.w.]

# MOTOR ACTIVITY

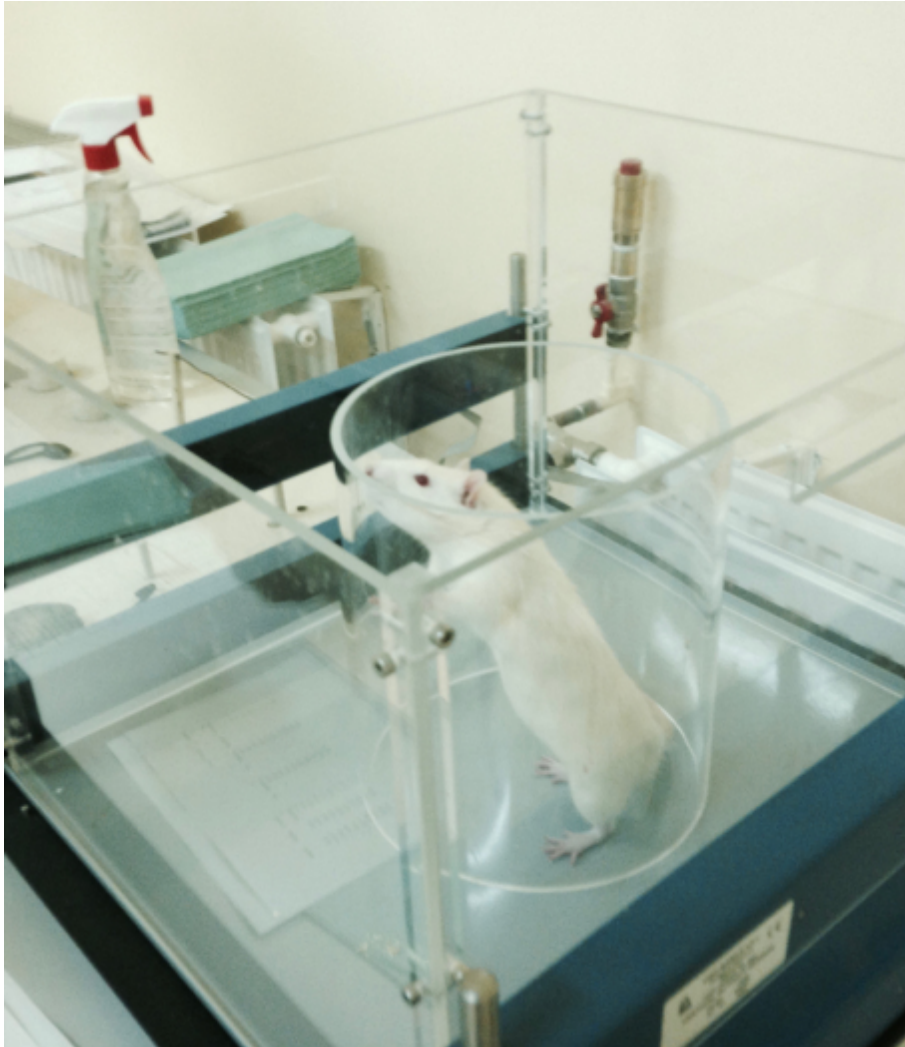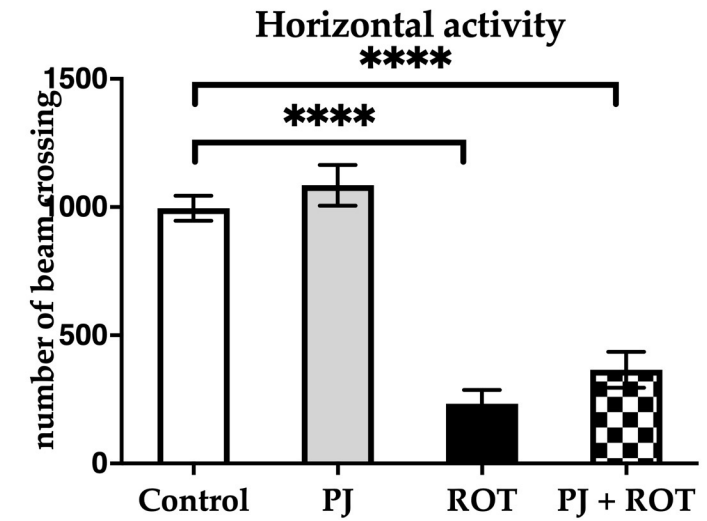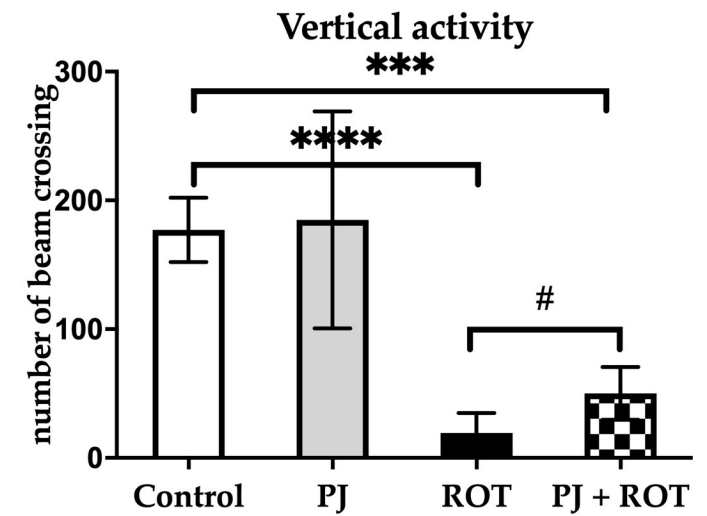

# ***OLFACTORY DISCRIMINATION TASK (ODT)***

**Discrimination index (DI)** – a ratio of

- the difference in exploration time between the two compartments (compartment non-familiar – compartment familiar)
- the total time of exploration for both compartments (compartment non-familiar + compartment familiar).

DI was expressed as a percentage, where positive and negative scores correspond to a preference towards non-familiar and familiar odors, respectively.

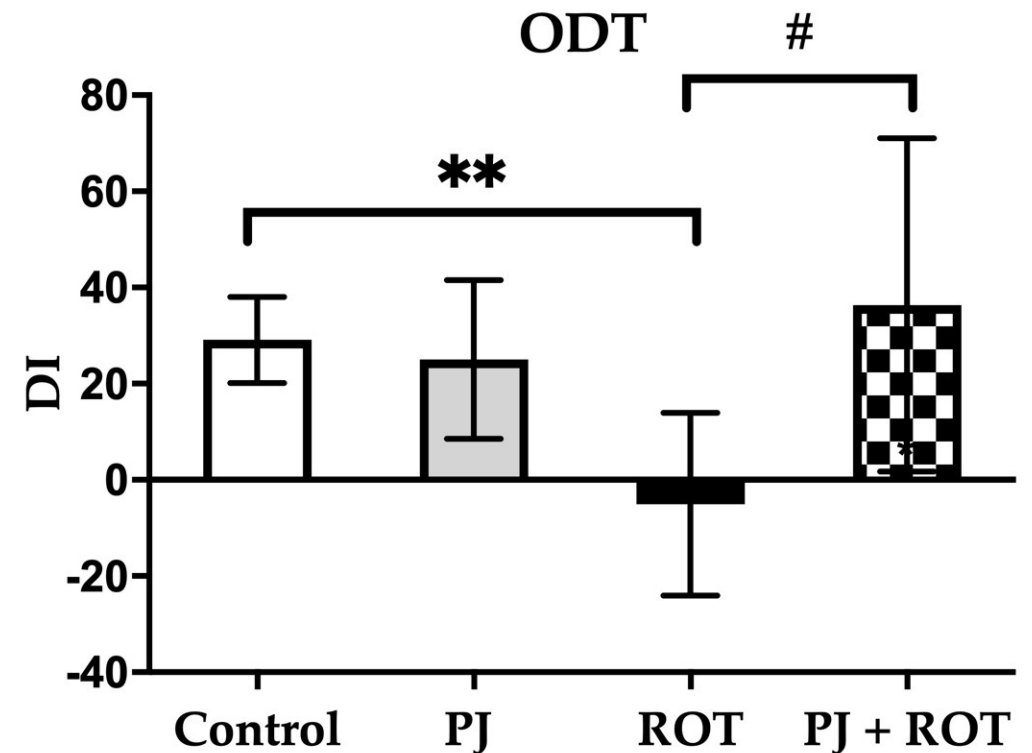

# DOPAMINE LEVEL

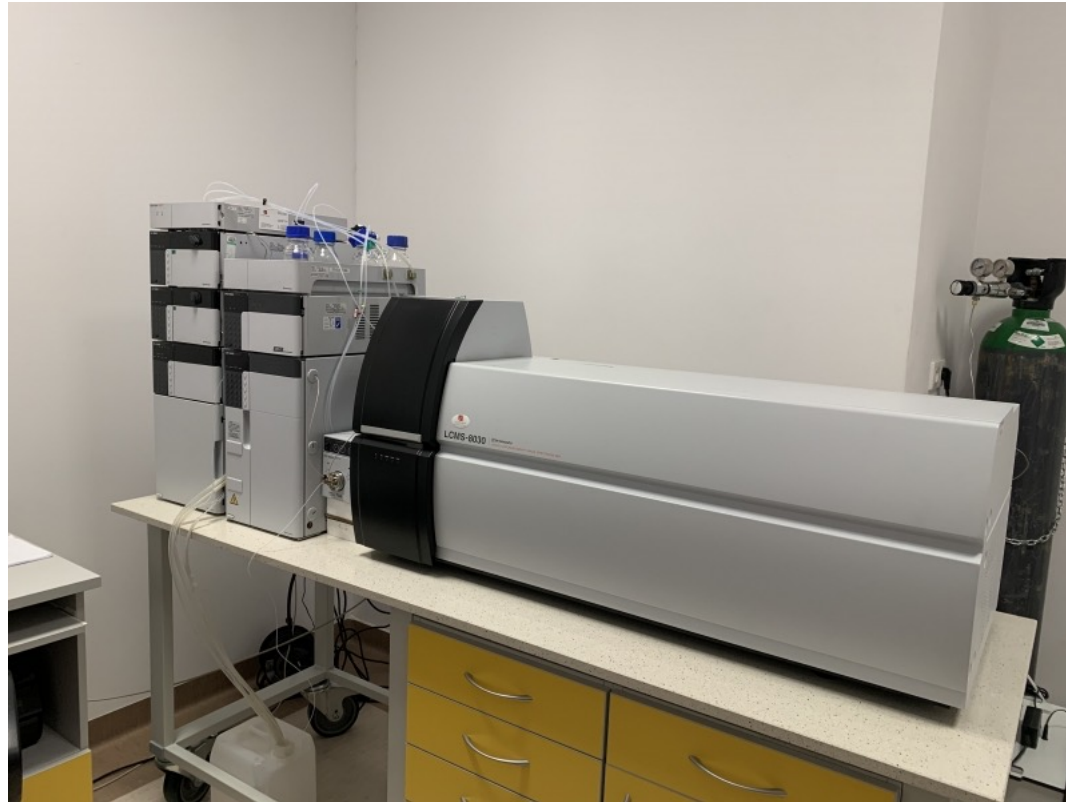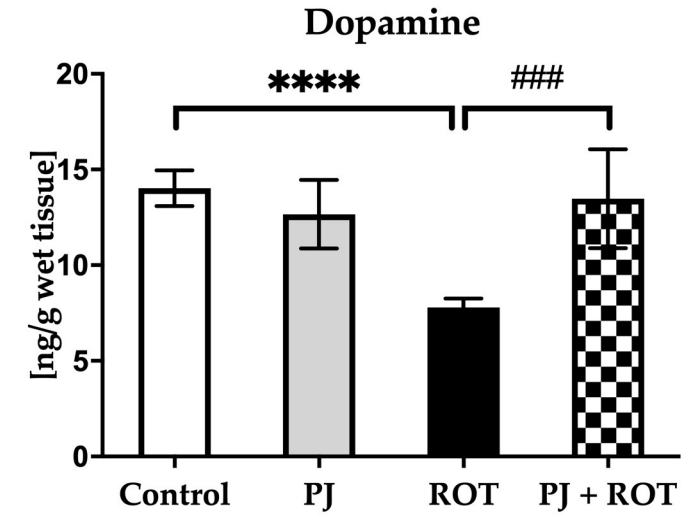

midbrain

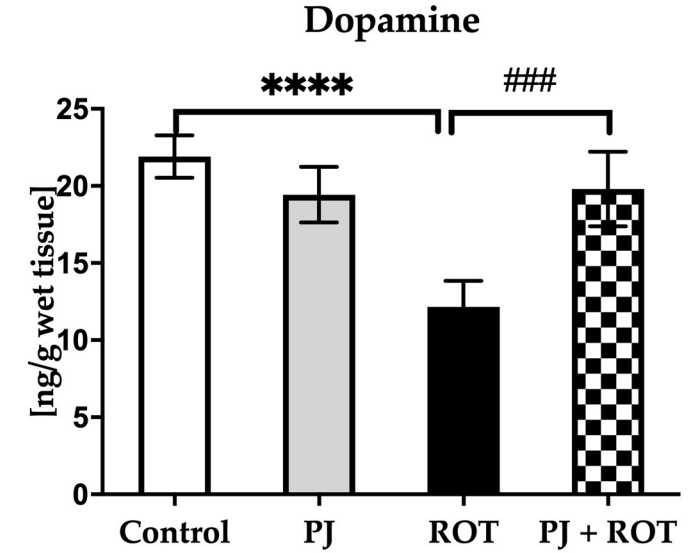

cortex



# *Conclusions and Perspectives*

*PJ treatment prevented*

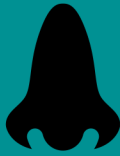

the development of PD-like olfactory impairment and slightly mitigated a motor deficit

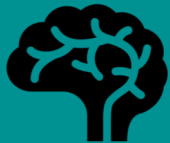

DA depletion in ROT-lesioned rats

# *Acknowledgment*

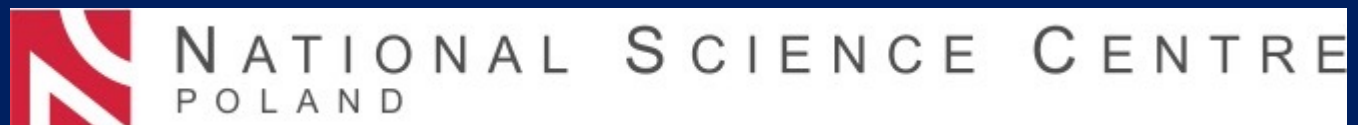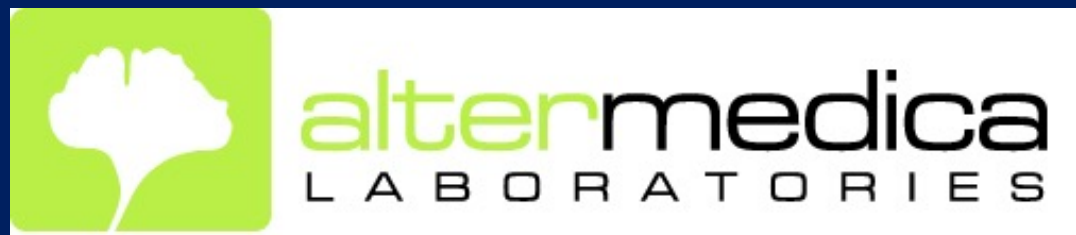

Supplement: s1 [file s1]
